# Supplementary material for: Effects of ammonia on the microstructure and crystallinity of nickel-based carbonate materials
Source: Royal Society of Chemistry journal article supplement (doi:10.1039/d4ce01156b), 2025-01-01
Supplement: d4ce01156b1.pdf [file d4ce01156b1.pdf]

## Supporting Information

### Effects of ammonia on microstructure and crystallinity of Nickel-based carbonate materials

**Jing Lao, Jiashen Zhang, Yangcheng Lu\***

State Key Laboratory of Chemical Engineering, Department of Chemical  
Engineering, Tsinghua University, Beijing 100084, China

\*Correspondence: [luyc@tsinghua.edu.cn](mailto:luyc@tsinghua.edu.cn); Tel.: +86-10-6277-3017

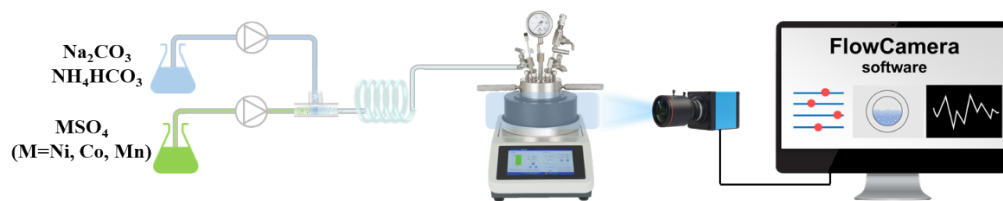

Fig. S1. Schematic of set-up for the synthesis of Ni-based carbonate materials.

**Crystallization process with ammonia participation**

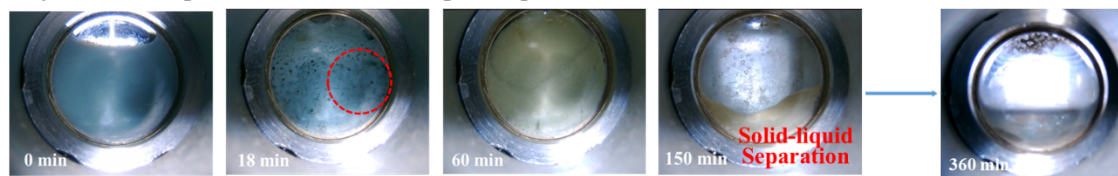

**Crystallization process without ammonia participation**

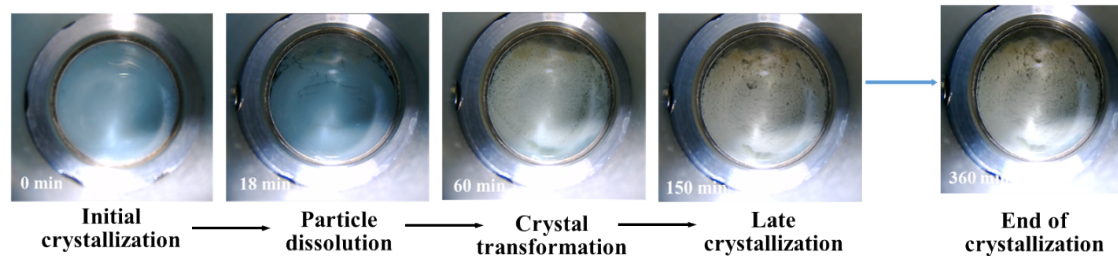

Fig. S2. Visual images of  $\text{MCO}_3$  after hydrothermal crystallizations with different times, with or without ammonia participation.

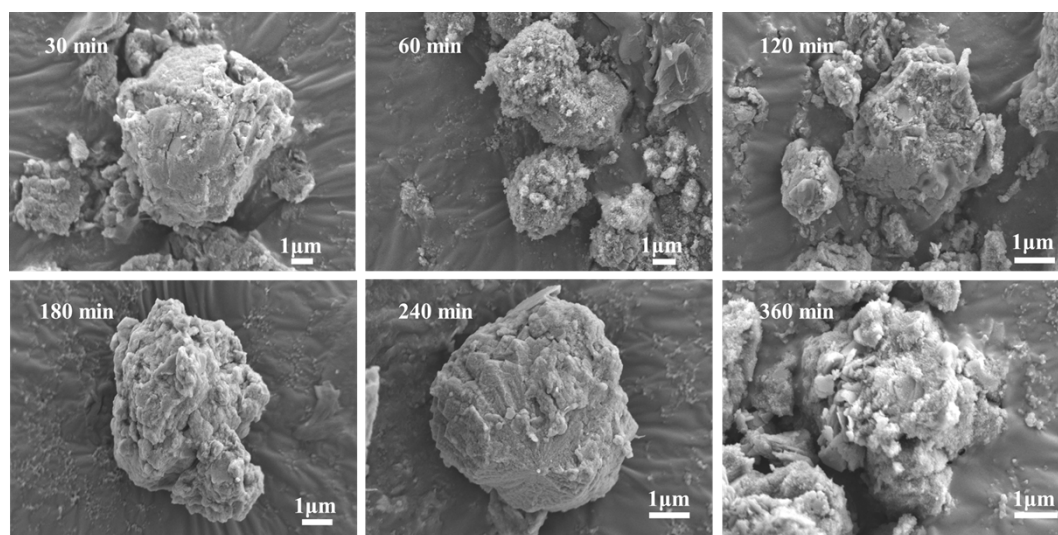

Fig. S3. The SEM images of  $\text{MCO}_3$  after hydrothermal crystallizations with different times without ammonia participation.

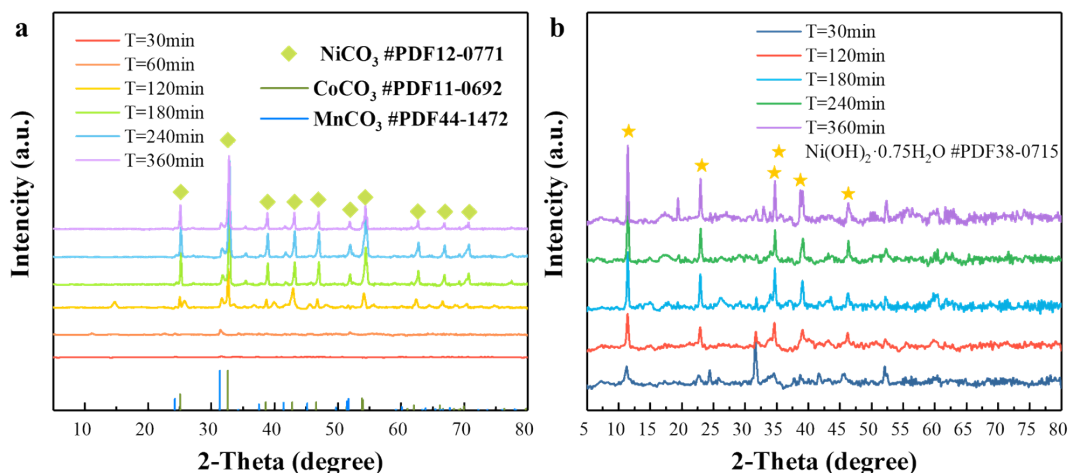

Fig. S4. The XRD spectra of MCO<sub>3</sub> after hydrothermal crystallizations with different times: (a) with ammonia; (b) without ammonia participation.

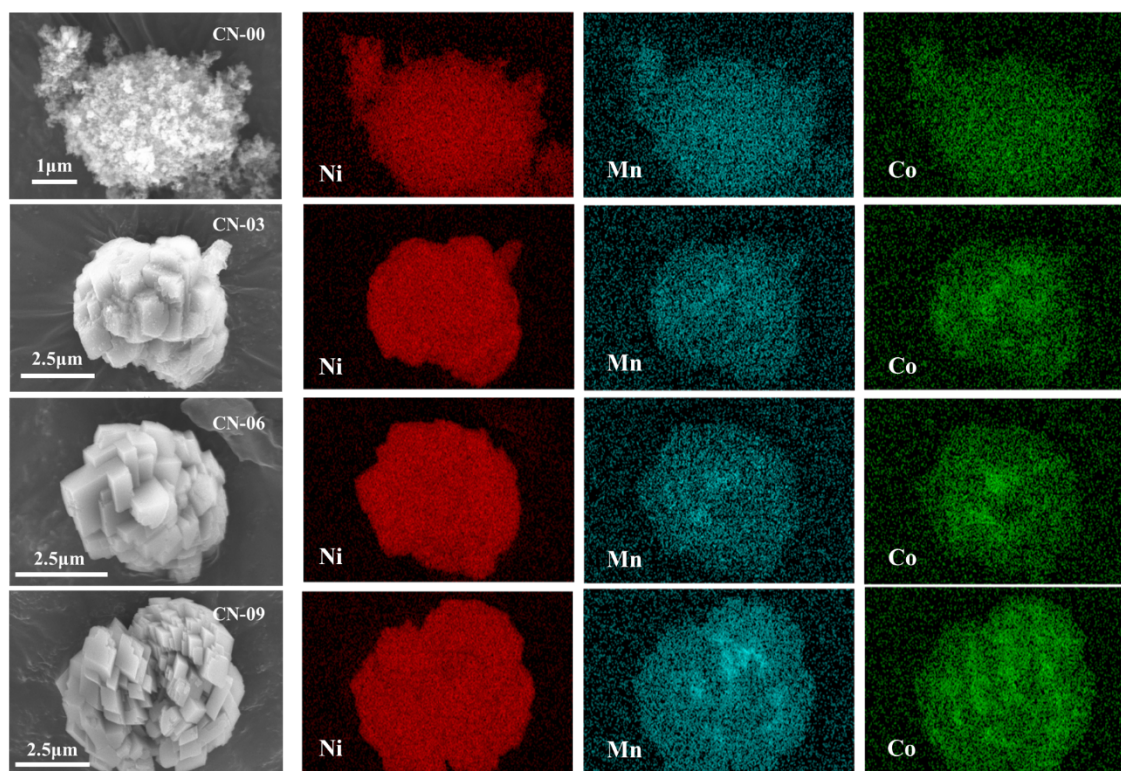

Fig. S5. The SEM image and corresponding EDS mappings of the CN-X samples.

### Measurements method of ammonia Concentrations in solution

Indophenol blue absorptiometry has been utilized for measuring ammonia concentrations. A mixture of 1 mL of filtered solution, 1 mL of 0.5M H<sub>2</sub>SO<sub>4</sub> solution, 5 mL of sodium phenate, and 1 mL of sodium hypochlorite was prepared in a 10 mL volumetric flask and subsequently diluted with distilled water. This solution was then placed in a quartz cell, and its absorbance spectrum at 630 nm was measured using an absorptiometer. The ammonia concentrations were determined by referencing a

calibration curve.<sup>1</sup>

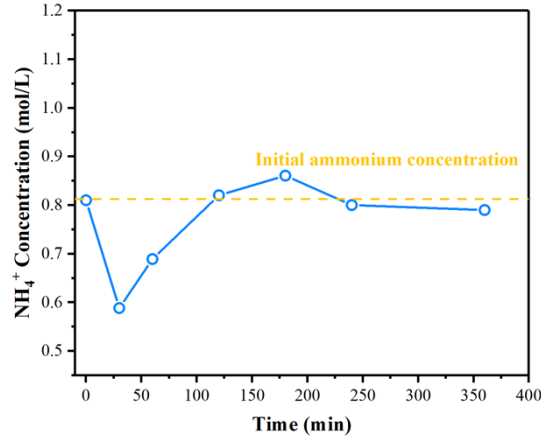

Fig. S6. The curves of ammonia concentration for MCO<sub>3</sub> at different reaction times ( $C_{\text{NH}_3}=0.9 \text{ M}$ ,  $T=180 \text{ }^\circ\text{C}$ ).

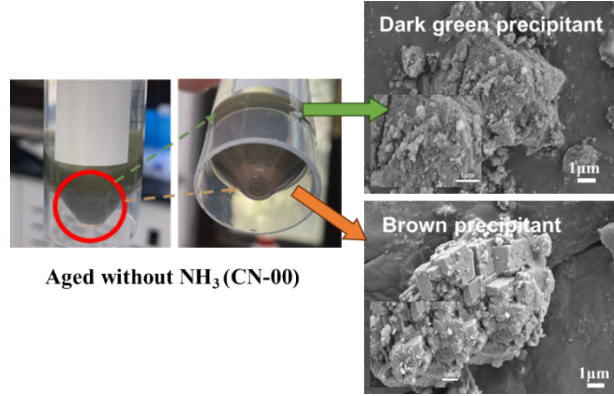

Fig. S7 The SEM images of precipitants with different appearances (sample CN-00).

### Theoretical calculation method

Precipitation reaction and complexation reaction mainly occur in the  $M^{2+}$ - $\text{NH}_3$ - $\text{CO}_3^{2-}$ - $\text{H}_2\text{O}$  system. The reaction equations related to the transition metal precipitation are listed as Eqs. (S1)-(S4):

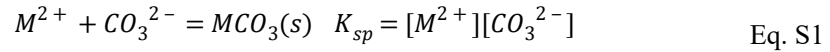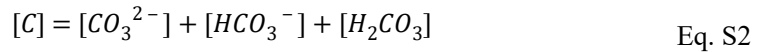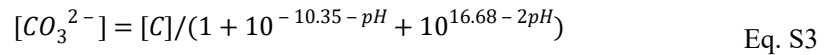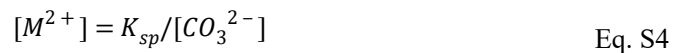

where  $K_{sp}$  represents the equilibrium constant of carbonate,  $[C]$  represents the total carbon content in solution.

Since the carbonate solution is usually a weakly alkaline solution, there will be a

hydroxide precipitation reaction process in the solution, and the formation equations are listed in Eqs. S5-S6.

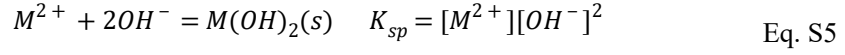

$$[M^{2+}] = K_{sp}/(10^{28+2pH}) \quad \text{Eq. S6}$$

The carbonate precipitation reaction and hydroxide precipitation reaction in the solution are competitive reactions, so the concentration of free metal ions in the solution is

$$[M^{2+}] = \min \{K_{sp}/[CO_3^{2-}], K_{sp}/(K_w^2 10^{2pH})\} \quad \text{Eq. S7}$$

The transition metal ions undergo a complexation reaction with the ligand as shown in Eq. S8.

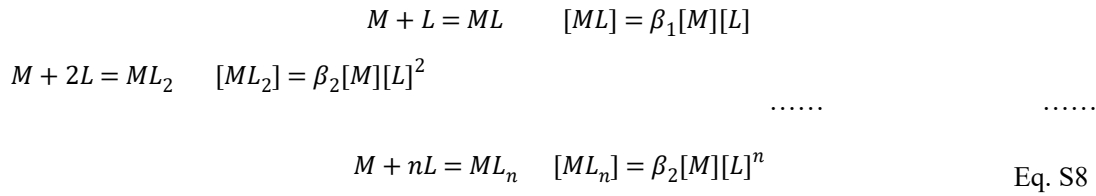

Where M represents the transitional ions,  $\beta_n$  the complexation reaction constant, n the number of ligands.

The calculation formula of Gibbs free energy  $\Delta G$  is shown in Eq. 9:

$$\Delta G_{Mc} = RT \ln K_{spMc} - RT \ln ([M^{2+}][CO_3^{2-}]) \quad \text{Eq. S9}$$

Table. S1 Equilibrium reactions and constants in Ni<sup>2+</sup>-NH<sub>3</sub>-CO<sub>3</sub><sup>2-</sup>-H<sub>2</sub>O<sup>2</sup>

| No. | Equation                                                                              | lgK    | No. | Equation                                                                              | lgK    |
|-----|---------------------------------------------------------------------------------------|--------|-----|---------------------------------------------------------------------------------------|--------|
| 1   | H <sub>2</sub> CO <sub>3</sub> = H <sup>+</sup> + HCO <sub>3</sub> <sup>-</sup>       | -6.35  | 21  | Co <sup>2+</sup> + 3OH <sup>-</sup> = Co(OH) <sub>3</sub> <sup>-</sup>                | 10.5   |
| 2   | HCO <sub>3</sub> <sup>-</sup> = H <sup>+</sup> + CO <sub>3</sub> <sup>2-</sup>        | -10.33 | 22  | Co <sup>2+</sup> + 4OH <sup>-</sup> = Co(OH) <sub>3</sub> <sup>-</sup>                | 10.2   |
| 3   | NH <sub>3</sub> +H <sup>+</sup> = NH <sub>4</sub> <sup>+</sup>                        | 9.25   | 23  | 2Co <sup>2+</sup> + OH <sup>-</sup> = Co <sub>2</sub> (OH) <sup>3+</sup>              | 2.7    |
| 4   | H <sub>2</sub> O = H <sup>+</sup> + OH <sup>-</sup>                                   | -14.0  | 24  | Co <sup>2+</sup> + NH <sub>3</sub> = Co(NH <sub>3</sub> ) <sup>2+</sup>               | 2.11   |
| 5   | NiCO <sub>3</sub> (s) = Ni <sup>2+</sup> + CO <sub>3</sub> <sup>2-</sup>              | -6.85  | 25  | Co <sup>2+</sup> + 2NH <sub>3</sub> = Co(NH <sub>3</sub> ) <sub>2</sub> <sup>2+</sup> | 3.74   |
| 6   | Ni(OH) <sub>2</sub> (s) = Ni <sup>2+</sup> + 2OH <sup>-</sup>                         | -15.26 | 26  | Co <sup>2+</sup> + 3NH <sub>3</sub> = Co(NH <sub>3</sub> ) <sub>3</sub> <sup>2+</sup> | 4.79   |
| 7   | Ni <sup>2+</sup> + OH <sup>-</sup> = Ni(OH) <sup>+</sup>                              | 4.97   | 27  | Co <sup>2+</sup> + 4NH <sub>3</sub> = Co(NH <sub>3</sub> ) <sub>4</sub> <sup>2+</sup> | 5.55   |
| 8   | Ni <sup>2+</sup> + 2OH <sup>-</sup> = Ni(OH) <sub>2</sub> <sup>0</sup>                | 8.55   | 28  | Co <sup>2+</sup> + 5NH <sub>3</sub> = Co(NH <sub>3</sub> ) <sub>5</sub> <sup>2+</sup> | 5.73   |
| 9   | Ni <sup>2+</sup> + 3OH <sup>-</sup> = Ni(OH) <sub>3</sub> <sup>-</sup>                | 11.33  | 29  | Co <sup>2+</sup> + 6NH <sub>3</sub> = Co(NH <sub>3</sub> ) <sub>6</sub> <sup>2+</sup> | 5.11   |
| 10  | 2Ni <sup>2+</sup> + OH <sup>-</sup> = Ni <sub>2</sub> (OH) <sup>3+</sup>              | 3.3    | 30  | MnCO <sub>3</sub> (s) = Mn <sup>2+</sup> + CO <sub>3</sub> <sup>2-</sup>              | -10.63 |
| 11  | Ni <sup>2+</sup> + NH <sub>3</sub> = Ni(NH <sub>3</sub> ) <sup>2+</sup>               | 2.8    | 31  | Mn(OH) <sub>2</sub> (s) = Mn <sup>2+</sup> + 2OH <sup>-</sup>                         | -12.72 |
| 12  | Ni <sup>2+</sup> + 2NH <sub>3</sub> = Ni(NH <sub>3</sub> ) <sub>2</sub> <sup>2+</sup> | 5.04   | 32  | Mn <sup>2+</sup> + OH <sup>-</sup> = Mn(OH) <sup>+</sup>                              | 3.9    |
| 13  | Ni <sup>2+</sup> + 3NH <sub>3</sub> = Ni(NH <sub>3</sub> ) <sub>3</sub> <sup>2+</sup> | 6.7    | 33  | Mn <sup>2+</sup> + 3OH <sup>-</sup> = Mn(OH) <sub>3</sub> <sup>-</sup>                | 8.3    |
| 14  | Ni <sup>2+</sup> + 4NH <sub>3</sub> = Ni(NH <sub>3</sub> ) <sub>4</sub> <sup>2+</sup> | 7.96   | 34  | Mn <sup>2+</sup> + 4OH <sup>-</sup> = Mn(OH) <sub>3</sub> <sup>-</sup>                | 7.7    |
| 15  | Ni <sup>2+</sup> + 5NH <sub>3</sub> = Ni(NH <sub>3</sub> ) <sub>5</sub> <sup>2+</sup> | 8.71   | 35  | 2Mn <sup>2+</sup> + OH <sup>-</sup> = Mn <sub>2</sub> (OH) <sup>3+</sup>              | 3.4    |

|    |                                     |        |    |                                     |     |
|----|-------------------------------------|--------|----|-------------------------------------|-----|
| 16 | $Ni^{2+} + 6NH_3 = Ni(NH_3)_6^{2+}$ | 8.74   | 36 | $Mn^{2+} + NH_3 = Mn(NH_3)^{2+}$    | 0.8 |
| 17 | $CoCO_3(s) = Co^{2+} + CO_3^{2-}$   | -12.84 | 37 | $Mn^{2+} + 2NH_3 = Mn(NH_3)_2^{2+}$ | 1.3 |
| 18 | $Co(OH)_2(s) = Co^{2+} + 2OH^-$     | -14.23 | 38 | $Mn^{2+} + 3NH_3 = Mn(NH_3)_3^{2+}$ | 1.7 |
| 19 | $Co^{2+} + OH^- = Co(OH)^+$         | 3.3    | 39 | $Mn^{2+} + 4NH_3 = Mn(NH_3)_4^{2+}$ | 1.3 |
| 20 | $Co^{2+} + 2OH^- = Co(OH)_2^0$      | 9.2    |    |                                     |     |

The total concentrations of metal ions  $[M^{2+}]_T$  are calculated by the sum of the concentrations of free metal ions. Meanwhile, total concentrations of ammonia  $[NH_3]_T$  can be obtained according to the following equations.

$$[M^{2+}]_T = [M^{2+}] + \sum_{n=1}^6 [M(NH_3)_n^{2+}] + \sum_{n=1}^6 [M(NH_3)_n^{2+}] + \sum_{n=1}^4 [M(OH)_n^{2-n}] \quad \text{Eq. S10}$$

$$[NH_3]_T = [NH_3] + [NH_4^+] + \sum [M(NH_3)_n^{2+}] \quad \text{Eq. S11}$$

$$[Ni^{2+}] = [Ni^{2+}]\{1 + 10^{2.8}[NH_3] + 10^{5.04}[NH_3]^2 + 10^{6.77}[NH_3]^3 + 10^{7.96}[NH_3]^4 + 10^{8.71}[NH_3]^5 + 10^{8.74}[NH_3]^6 + 10^{pH-9.03} + 10^{2pH-19.45} + 10^{3pH-30.67}\} \quad \text{Eq. S12}$$

$$[Co^{2+}]_T = [Co^{2+}]\{1 + 10^{2.11}[NH_3] + 10^{3.74}[NH_3]^2 + 10^{4.79}[NH_3]^3 + 10^{5.55}[NH_3]^4 + 10^{5.73}[NH_3]^5 + 10^{5.11}[NH_3]^6 + 10^{pH-10.7} + 10^{2pH-18.8} + 10^{3pH-31.5} + 10^{4pH-53.8}\} \quad \text{Eq. S13}$$

$$[Mn^{2+}]_T = [Mn^{2+}]\{1 + 10^{0.8}[NH_3] + 10^{1.3}[NH_3]^2 + 10^{1.7}[NH_3]^3 + 10^{1.3}[NH_3]^4 + 10^{pH-10.01} + 10^{3pH-33.7} + 10^{4pH-56.3}\} \quad \text{Eq. S14}$$

$$[NH_3]_T = [NH_3]\{1 + 10^{9.27-pH} + 10^{10.78-pH}[CO_3^{2-}] + 10^{2.8}[Ni^{2+}] + 10^{5.04}[Ni^{2+}][NH_3] + 10^{6.77}[Ni^{2+}][NH_3]^2 + 10^{7.96}[Ni^{2+}][NH_3]^3 + 10^{8.71}[Ni^{2+}][NH_3]^4 + 10^{8.74}[Ni^{2+}][NH_3]^5 + 10^{2.11}[Co^{2+}] + 10^{3.74}[Co^{2+}][NH_3] + 10^{4.79}[Co^{2+}][NH_3]^2 + 10^{5.55}[Co^{2+}][NH_3]^3 + 10^{5.73}[Co^{2+}][NH_3]^4 + 10^{5.11}[Co^{2+}][NH_3]^5 + 10^{0.8}[Mn^{2+}] + 10^{1.3}[Mn^{2+}][NH_3] + 10^{1.7}[Mn^{2+}][NH_3]^2 + 10^{1.3}[Co^{2+}][NH_3]^3\} \quad \text{Eq. S15}$$

Suppose  $[C]$  and  $[NH_3]_T$  are certain values in the solution, according to the thermodynamic models with considerations on the reactions above, the values of  $[M^{2+}]_T$  vs pH can be calculated through Eqs. S7, S12-15.

Then, the concentration of metal-ammonia complex  $[Ni(NH_3)_n^{2+}]$  can be calculated with following formula<sup>3</sup>.

$$[Ni(NH_3)_n^{2+}] = [Ni^{2+}]_T - [Ni^{2+}] \quad \text{Eq. S16}$$

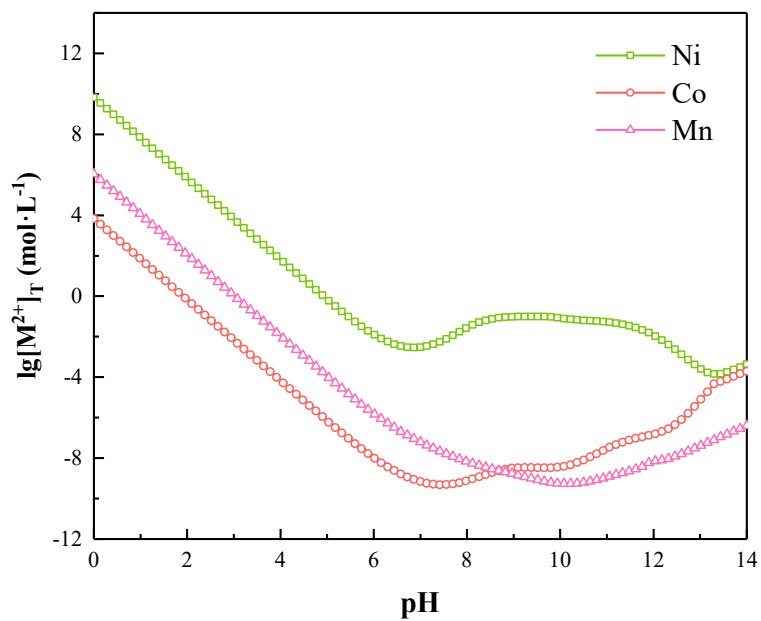

Fig. S8. Plots of  $\lg[M^{2+}]_T$  (M=Ni, Co, Mn) vs pH.

#### Reference

1. K. Funakoshi, S. Yoshizawa and M. Matsuoka, *Crystal Growth & Design*, 2016, **16**, 1824-1828.
2. A. D. John, *Lange's handbook of chemistry, Fifth Edition, Mc. Graw Hill Inc, New York. Conference*, 1999.
3. Y. Shen, Y. Wu, H. Xue, S. Wang, D. Yin, L. Wang and Y. Cheng, *ACS Applied Materials & Interfaces*, 2021, **13**, 717-726.
